# Supplementary material for: Comparative Targeted Proteomics of the Central Metabolism and Photosystems in SigE Mutant Strains of Synechocystis sp. PCC 6803
Source: MDPI journal article supplement (doi:10.3390/molecules23051051), 2018-05-01
Supplement: s1 [file s1]

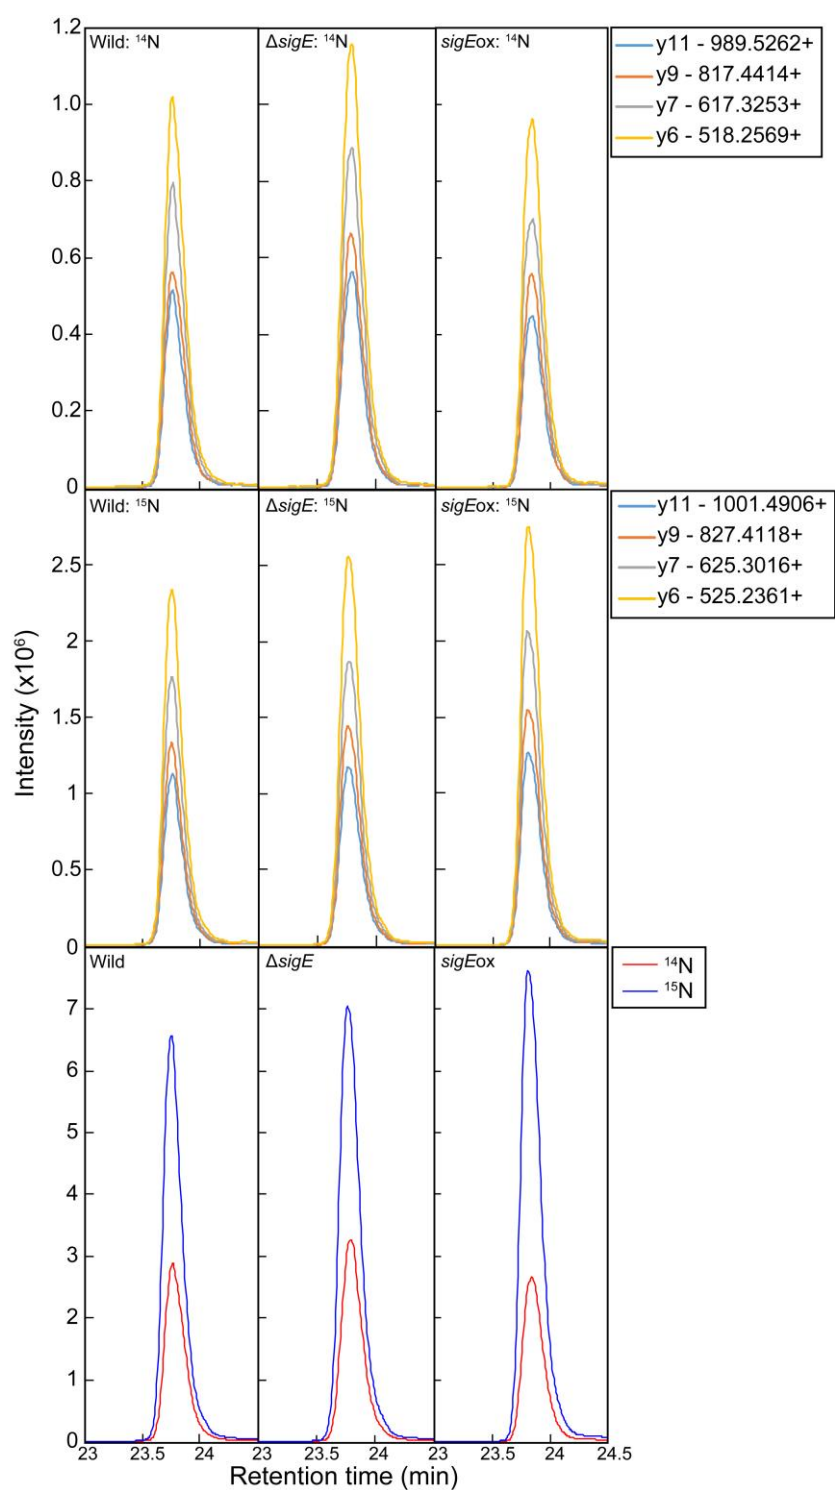

**Figure S1** SRM spectra of the peptide EVTASLVGADAGK (ApcB). (Top) Transition spectra of  $^{14}\text{N}$  peptide sample. (Middle) Transition spectra of  $^{15}\text{N}$ -labeled peptide sample. (Bottom)  $^{15}\text{N}$ -labeled peptide and  $^{14}\text{N}$  peptide spectra.

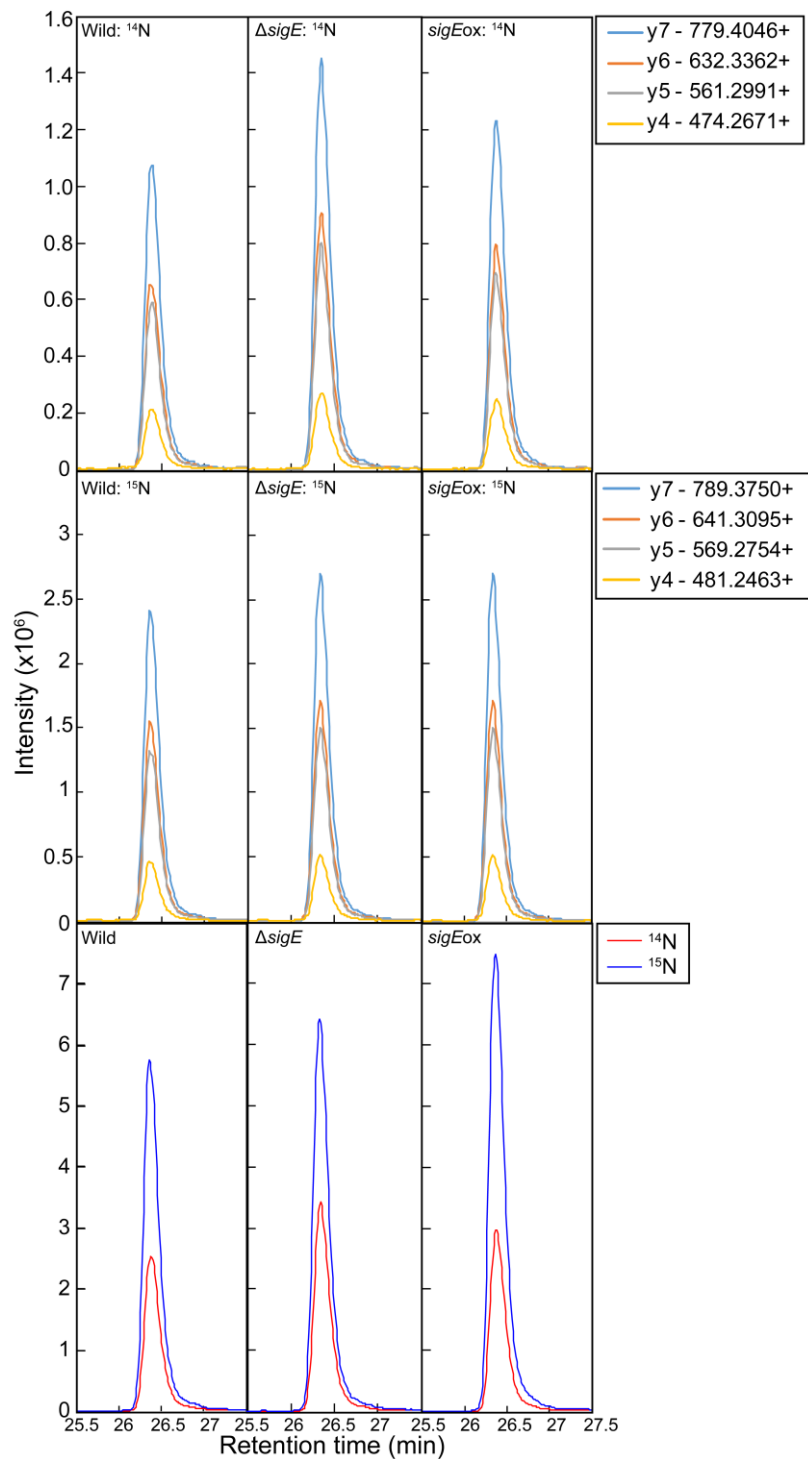

**Figure S2** SRM spectra of the peptide SYFASGELR (ApcB). (Top) Transition spectra of  $^{14}\text{N}$  peptide sample. (Middle) Transition spectra of  $^{15}\text{N}$ -labeled peptide sample. (Bottom)  $^{15}\text{N}$ -labeled peptide and  $^{14}\text{N}$  peptide spectra.

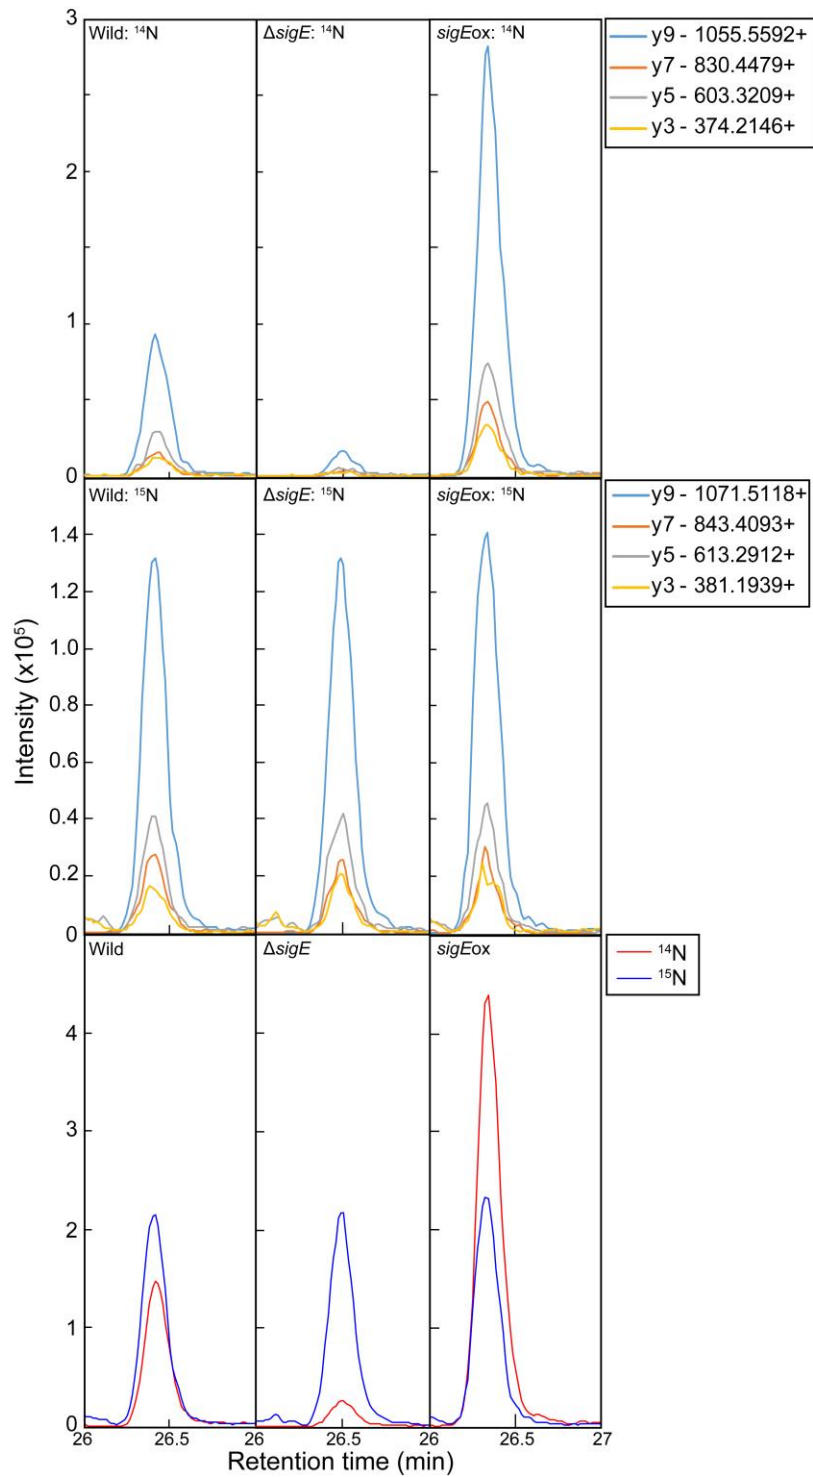

**Figure S3** SRM spectra of the peptide AVL PQNLTQAQR (Gnd). (Top) Transition spectra of  $^{14}N$  peptide sample. (Middle) Transition spectra of  $^{15}N$ -labeled peptide sample. (Bottom)  $^{15}N$ -labeled peptide and  $^{14}N$  peptide spectra.

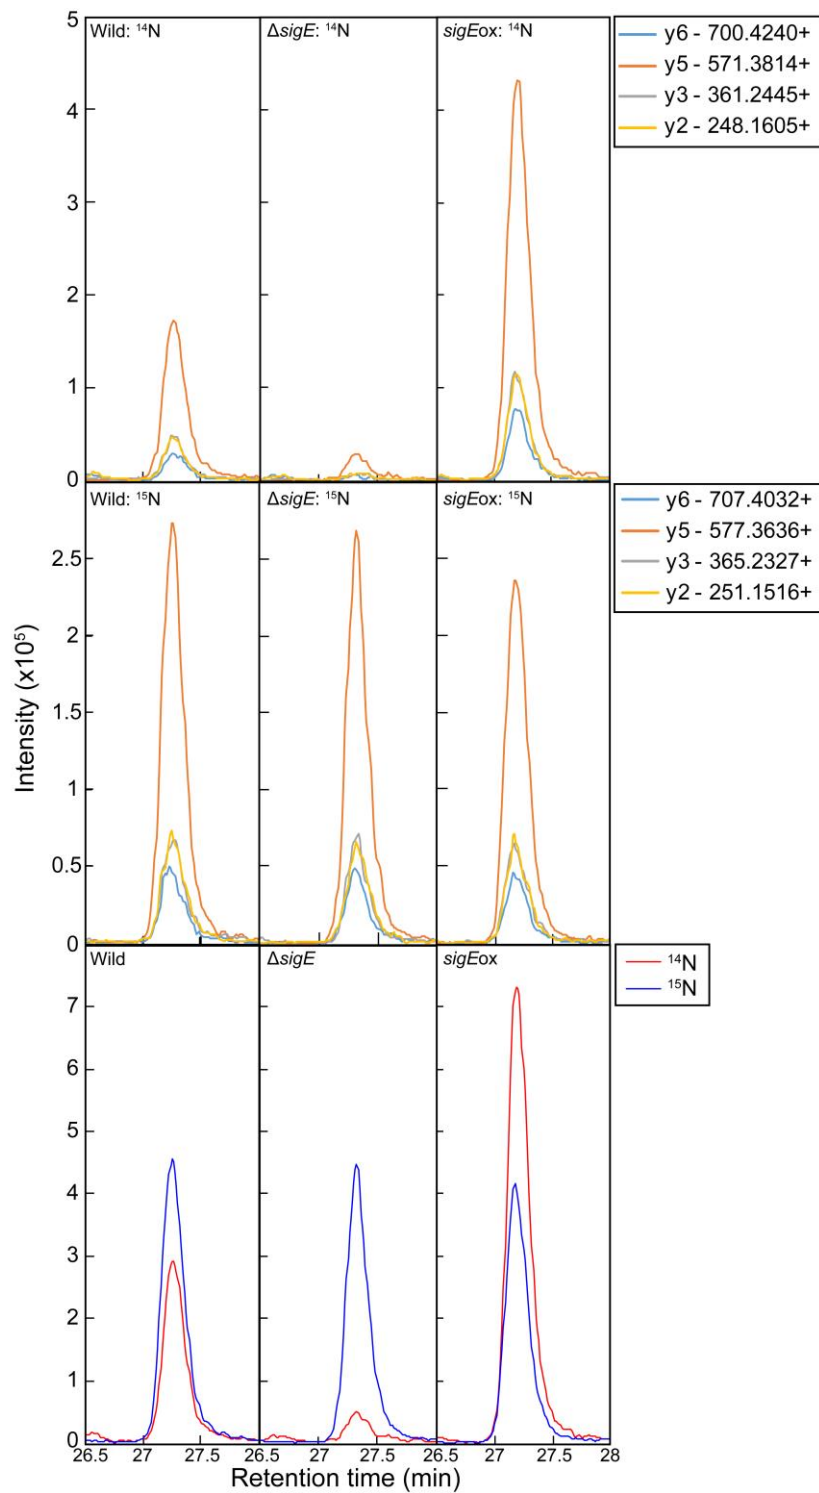

**Figure S4** SRM spectra of the peptide ELEPILTK (Gnd). (Top) Transition spectra of  $^{14}\text{N}$  peptide sample. (Middle) Transition spectra of  $^{15}\text{N}$ -labeled peptide sample. (Bottom)  $^{15}\text{N}$ -labeled peptide and  $^{14}\text{N}$  peptide spectra.

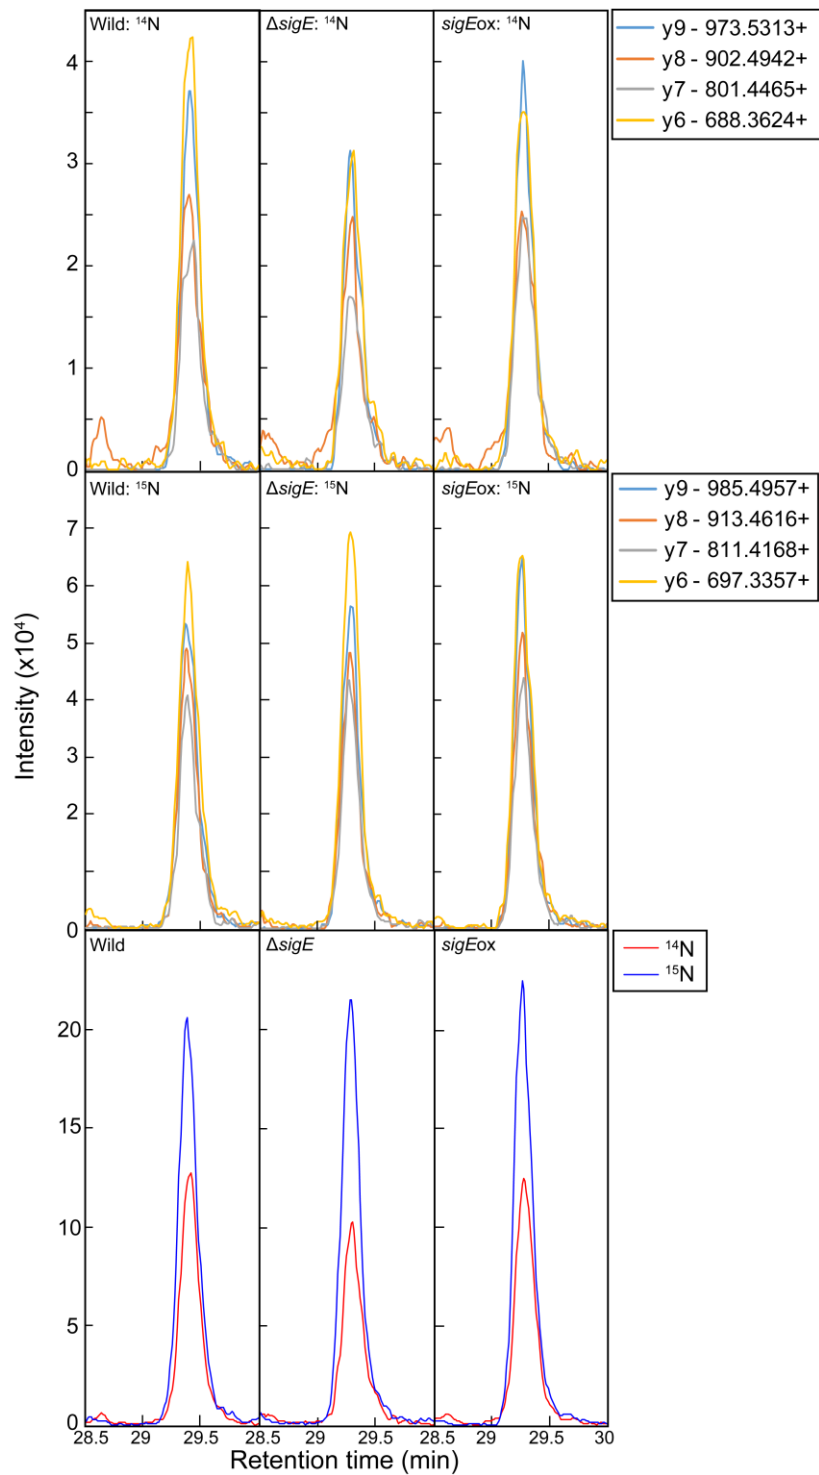

**Figure S5** SRM spectra of the peptide VPATIEEIAAR (Eno). (Top) Transition spectra of  $^{14}\text{N}$  peptide sample. (Middle) Transition spectra of  $^{15}\text{N}$ -labeled peptide sample. (Bottom)  $^{15}\text{N}$ -labeled peptide and  $^{14}\text{N}$  peptide spectra.

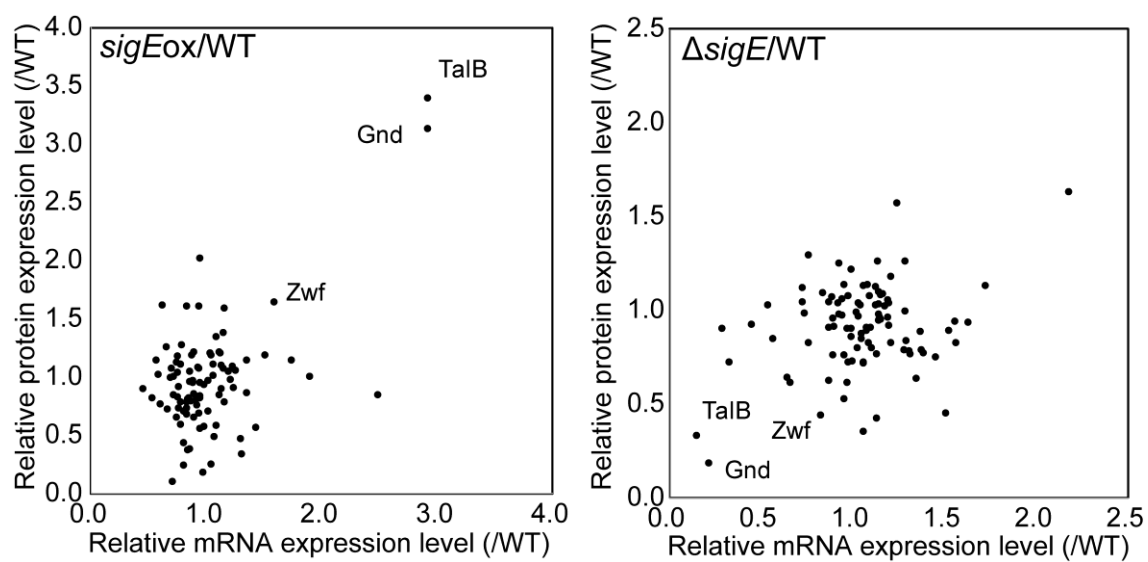

**Figure S6** Comparison with the relative abundances of mRNAs and proteins
